# Supplementary material for: Analysis of the Influence of Jaw Periosteal Cells on Macrophages Phenotype Using an Innovative Horizontal Coculture System
Source: MDPI journal article supplement (doi:10.3390/biomedicines9121753), 2021-11-24
Supplement: s1 [file s1]

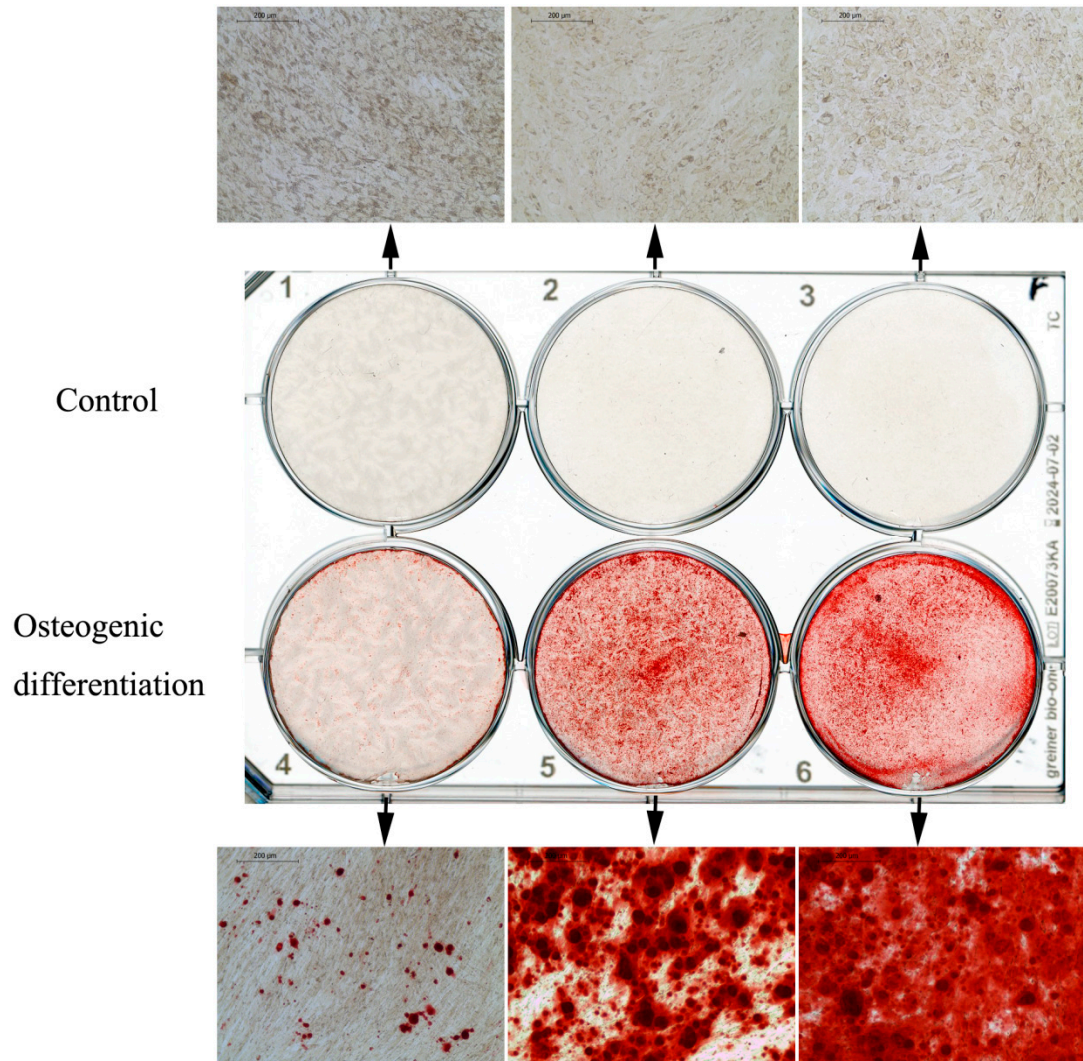

**Figure S1.** Analysis of the osteogenic differentiation capacity of used jaw periosteal cells derived from 3 donors, as detected by the Alizarin staining of calcium phosphate precipitates (red); scale bar: 200  $\mu\text{m}$ .

A

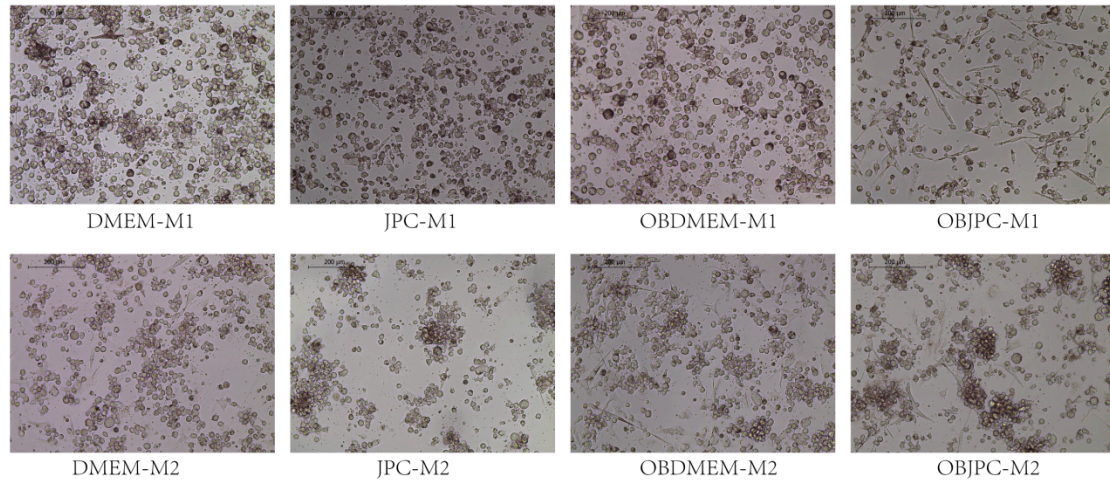

B

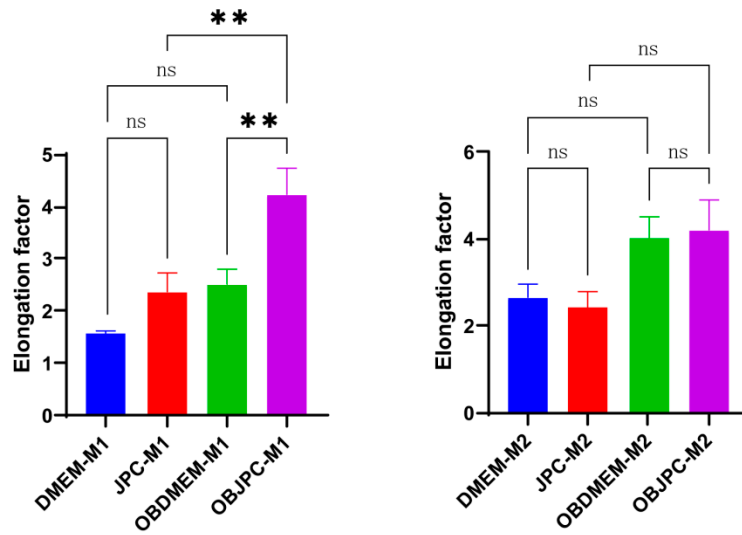

**Figure S2.** Cell morphology and quantification of the elongation factor of mono- and cocultured M1/M2 macrophages. A: Representative phase contrast microscopic pictures of mono- (DMEM, OBDMEM groups) and cocultured (JPC, OBJPC groups) M1 and M2 macrophages cultivated within the coculture system; scale bar: 200  $\mu$ m. B: Analysis of the elongation factor of mono- and cocultured M1 and M2 macrophages (n=30 cells per group. \*\* $p<0.01$ )

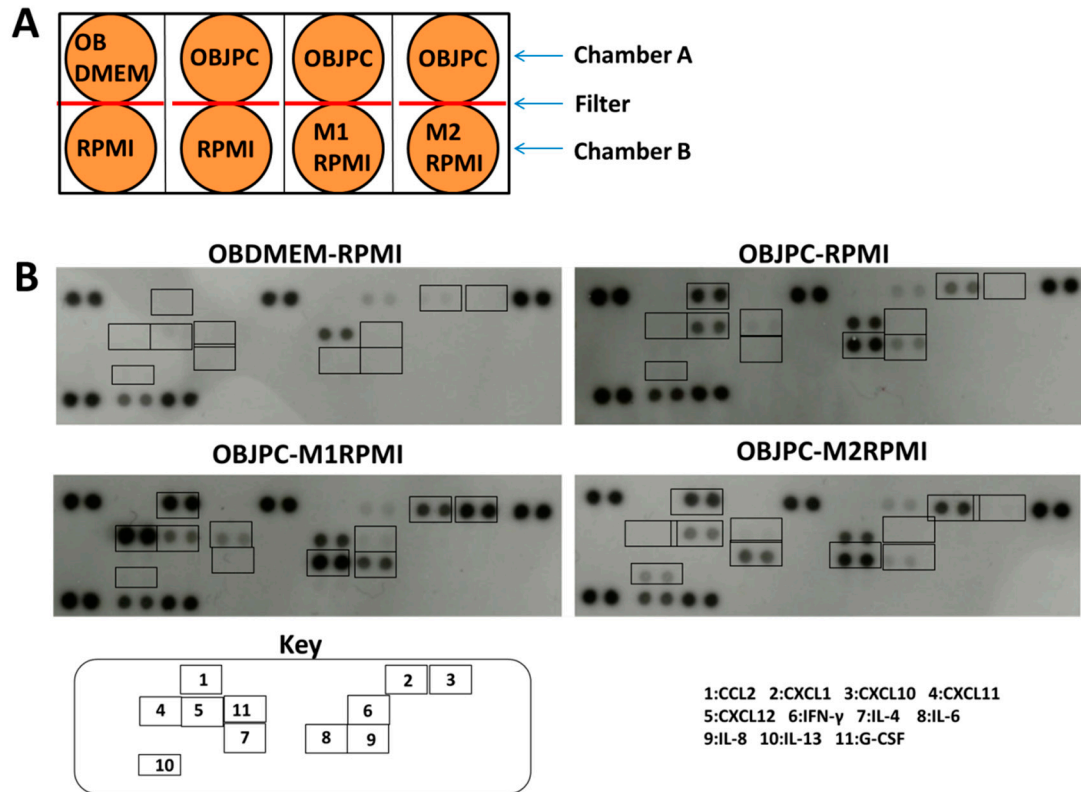

**Figure S3.** Protein expression analyses in supernatants from monocultured osteogenically induced JPCs (OBJPC). A: Layout of the OBJPC monoculture experiments (OBDMEM: cell-free OBDMEM medium; OBJPC: osteogenically induced JPCs; RPMI: cell-free RPMI medium; M1RPMI: cell-free RPMI medium + LPS + IFN- $\gamma$ ; M2RPMI: cell-free RPMI medium + IL-4 + IL-13). B: Images of proteome membranes incubated with supernatants collected from chamber B (the rectangle marked the spots which were differentially expressed proteins between groups).

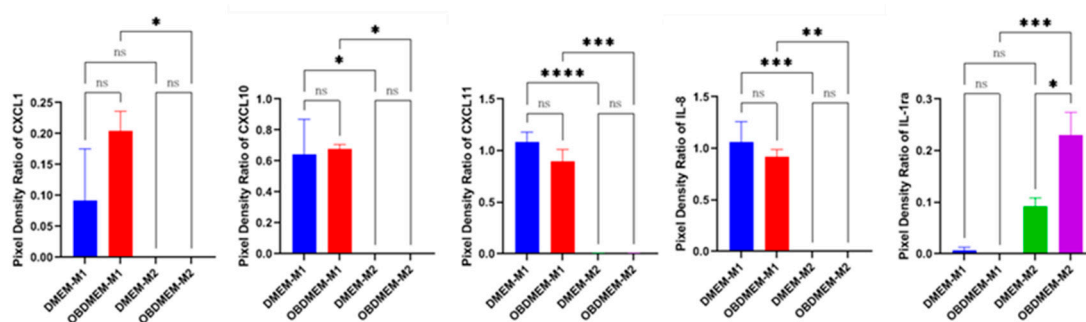

**Figure S4.** Comparison of cytokines/chemokines secretion in the supernatants of monocultured M1 and M2 macrophages under normal (DMEM) or osteogenic (OBDMEM) conditions (n=3, \* $p < 0.05$ , \*\* $p < 0.01$ , \*\*\* $p < 0.001$ , \*\*\*\* $p < 0.0001$ ).

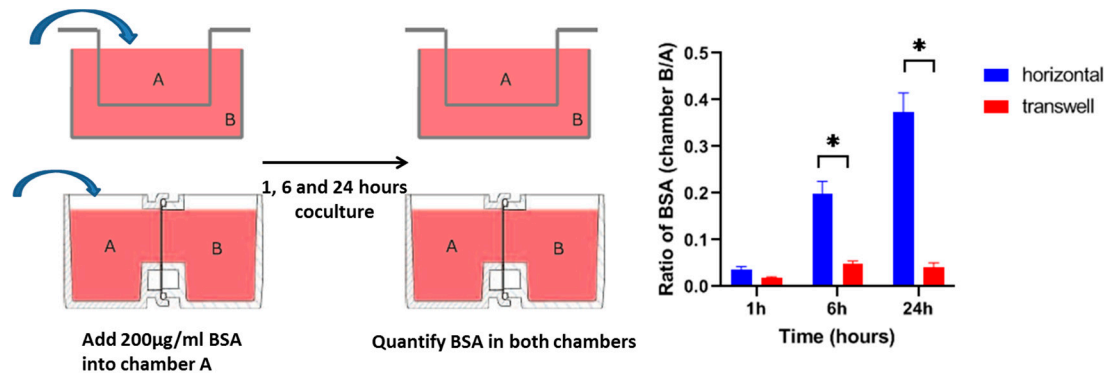

**Figure S5.** Comparison of the BSA diffusion capacity within the conventional transwell and the horizontal coculture system after 1, 6 and 24 hours of incubation. The ratio of quantified BSA (chamber B/chamber A) in the horizontal coculture plate was significantly higher than that detected in the transwell plate.

**Table S1:** Secretion of OBJPCs in mono-cultures. Secretion of OBJPCs cultivated as monocultures in the horizontal coculture system. OBJPCs were cocultured under M1 (LPS/IFN- $\gamma$ ) or M2 (IL-4/IL-13) conditions and cytokines/chemokines expression patterns were analyzed by human cytokine proteome arrays.

| Groups                   | M1 culture conditions (LPS/IFN- $\gamma$ ) | M2 culture conditions (IL-4/IL-13) |
|--------------------------|--------------------------------------------|------------------------------------|
| Cytokines/<br>Chemokines | CCL2/MCP-1                                 |                                    |
|                          | CXCL1/GRO $\alpha$                         |                                    |
|                          | CXCL10/IP-10                               |                                    |
|                          | CXCL11/I-TAC                               |                                    |
|                          | CXCL12/SDF-1                               |                                    |
|                          | G-CSF                                      |                                    |
|                          | IL-6                                       |                                    |
|                          | IL-8 <sup>high</sup>                       | IL-8 <sup>low</sup>                |
